# Supplementary material
Source: PubMed Central journal article supplement (PMC9113290)

**Figure S1.** Results of RAxML analysis without *Burmeistera* collapsed, as in Fig 2. Tip names corresponding to Sample\_ID from Appendix S1.

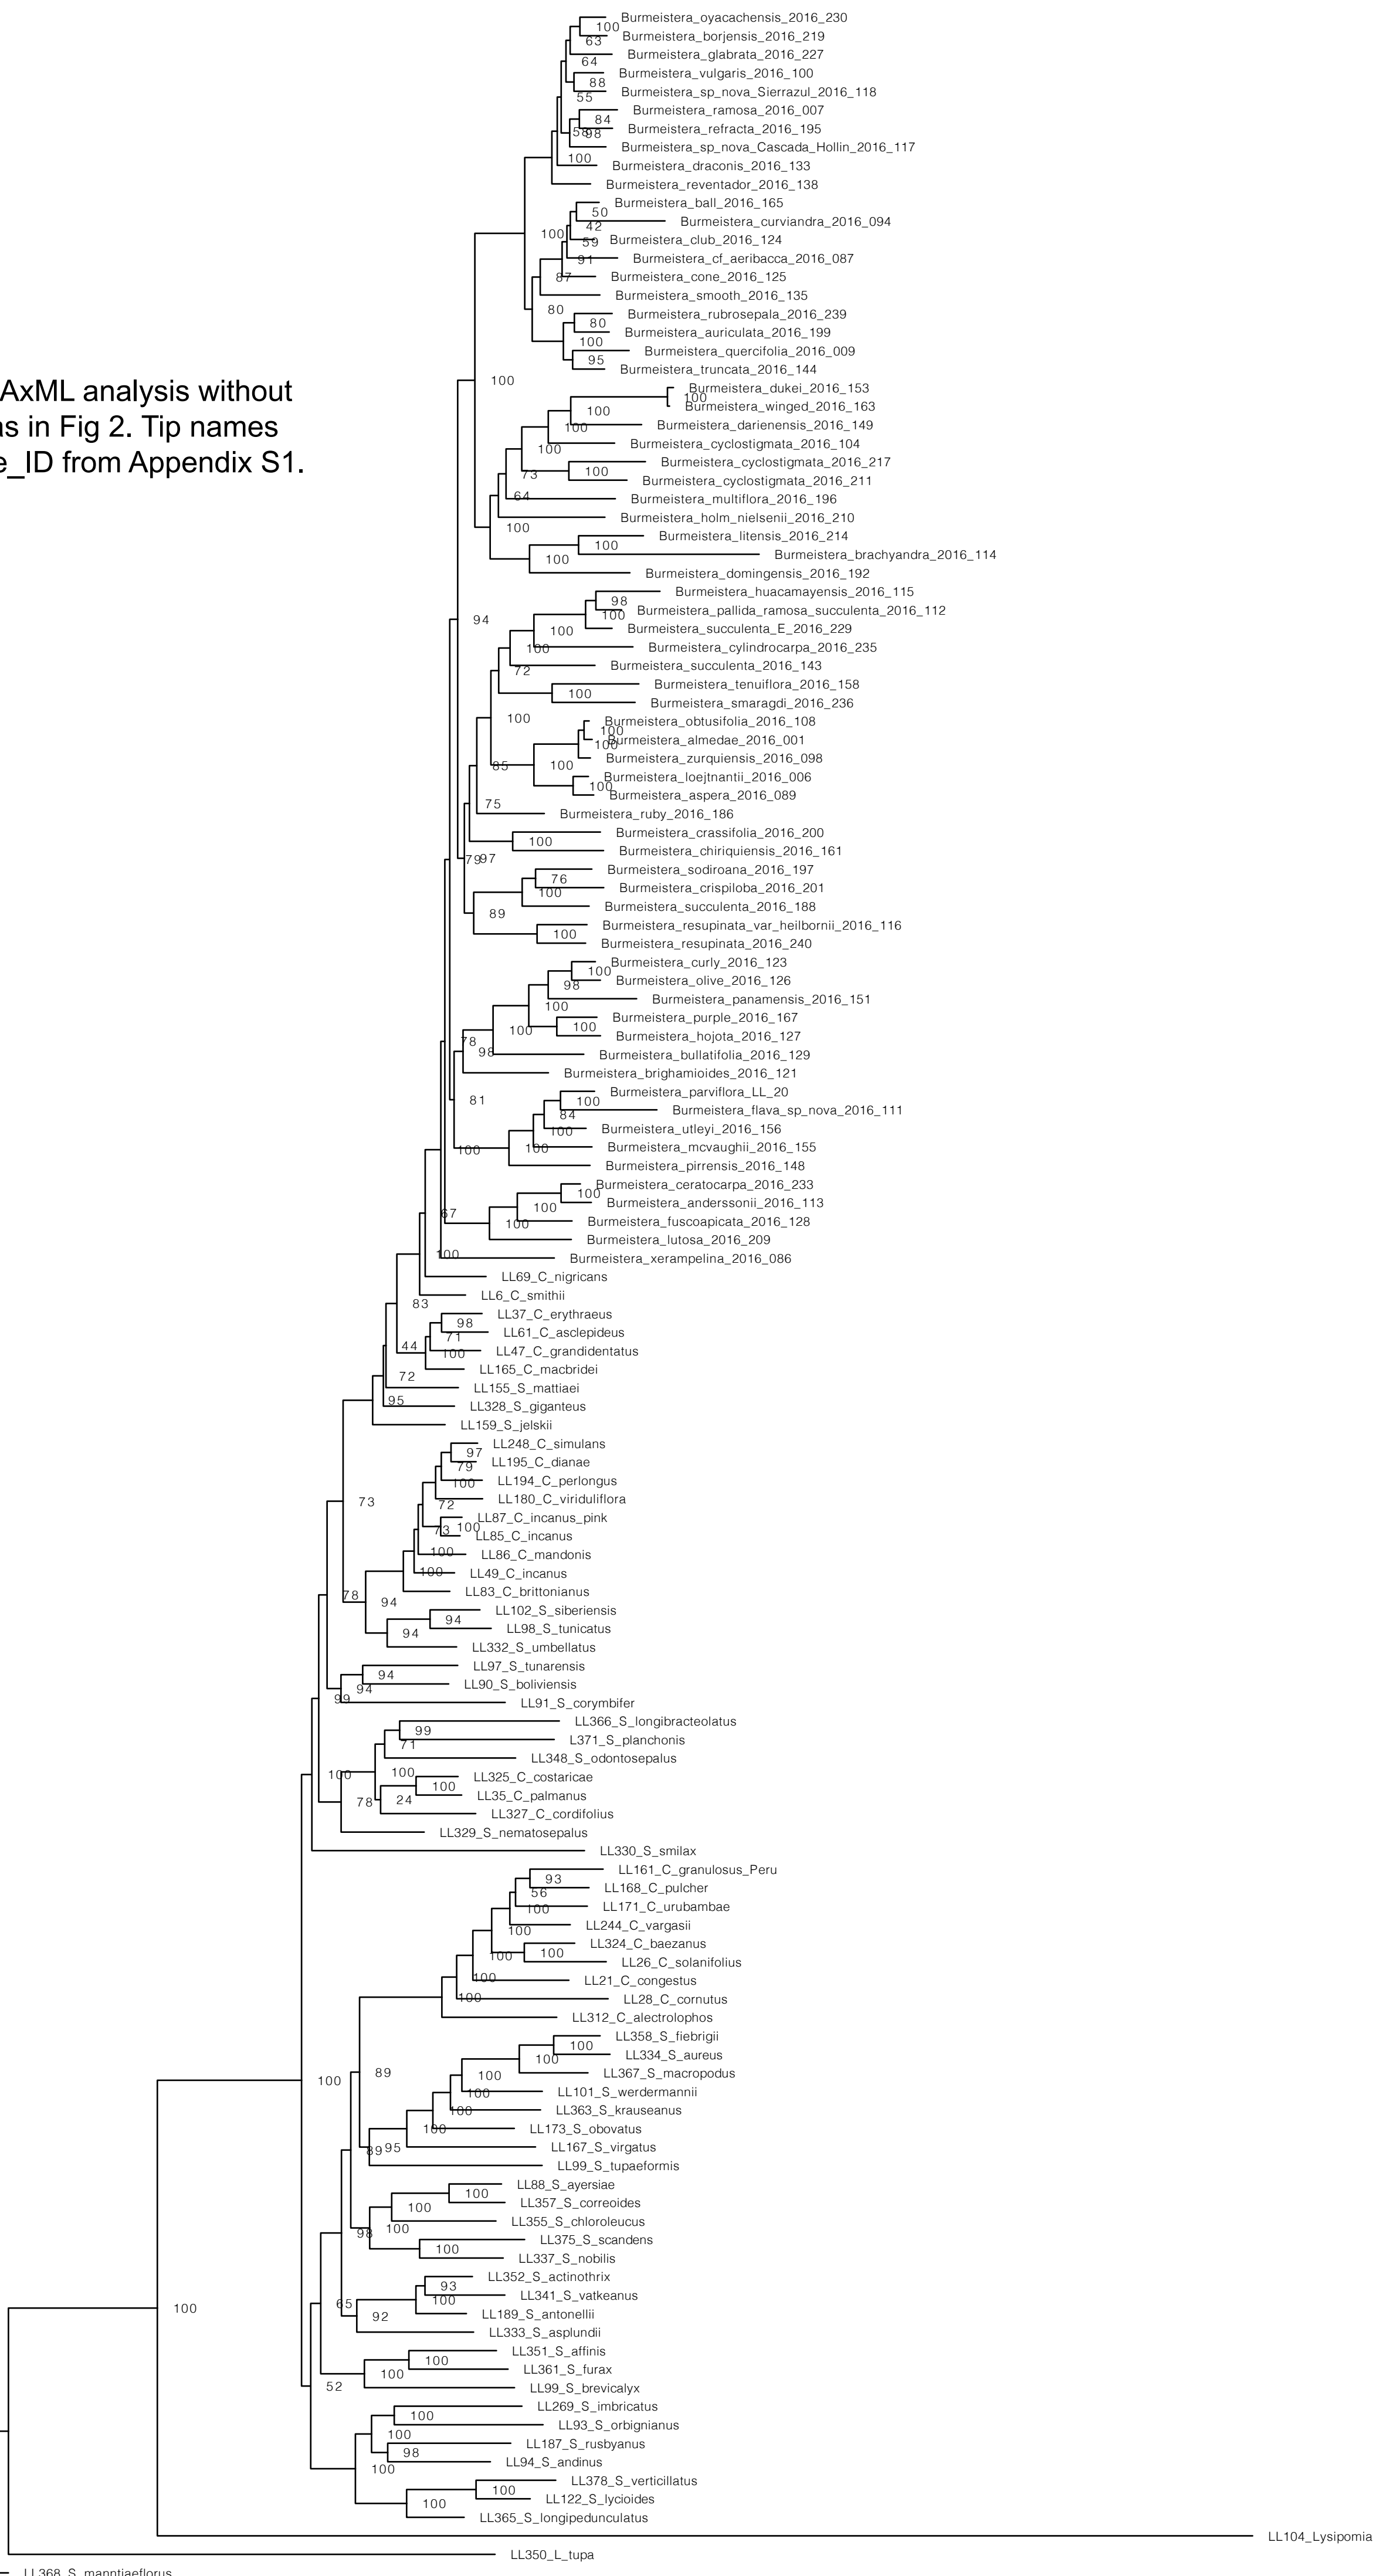

Supplement: mcac046_suppl_supplementary_figure_s1.pdf [file mcac046_suppl_supplementary_figure_s1.pdf]
