# Supplementary material
Source: PubMed Central journal article supplement (PMC9113290)

**Figure S4.** Results of SVDquartets analysis without *Burmeistera* collapsed, as in Fig 3c. Tip names corresponding to Sample\_ID from Appendix S1.

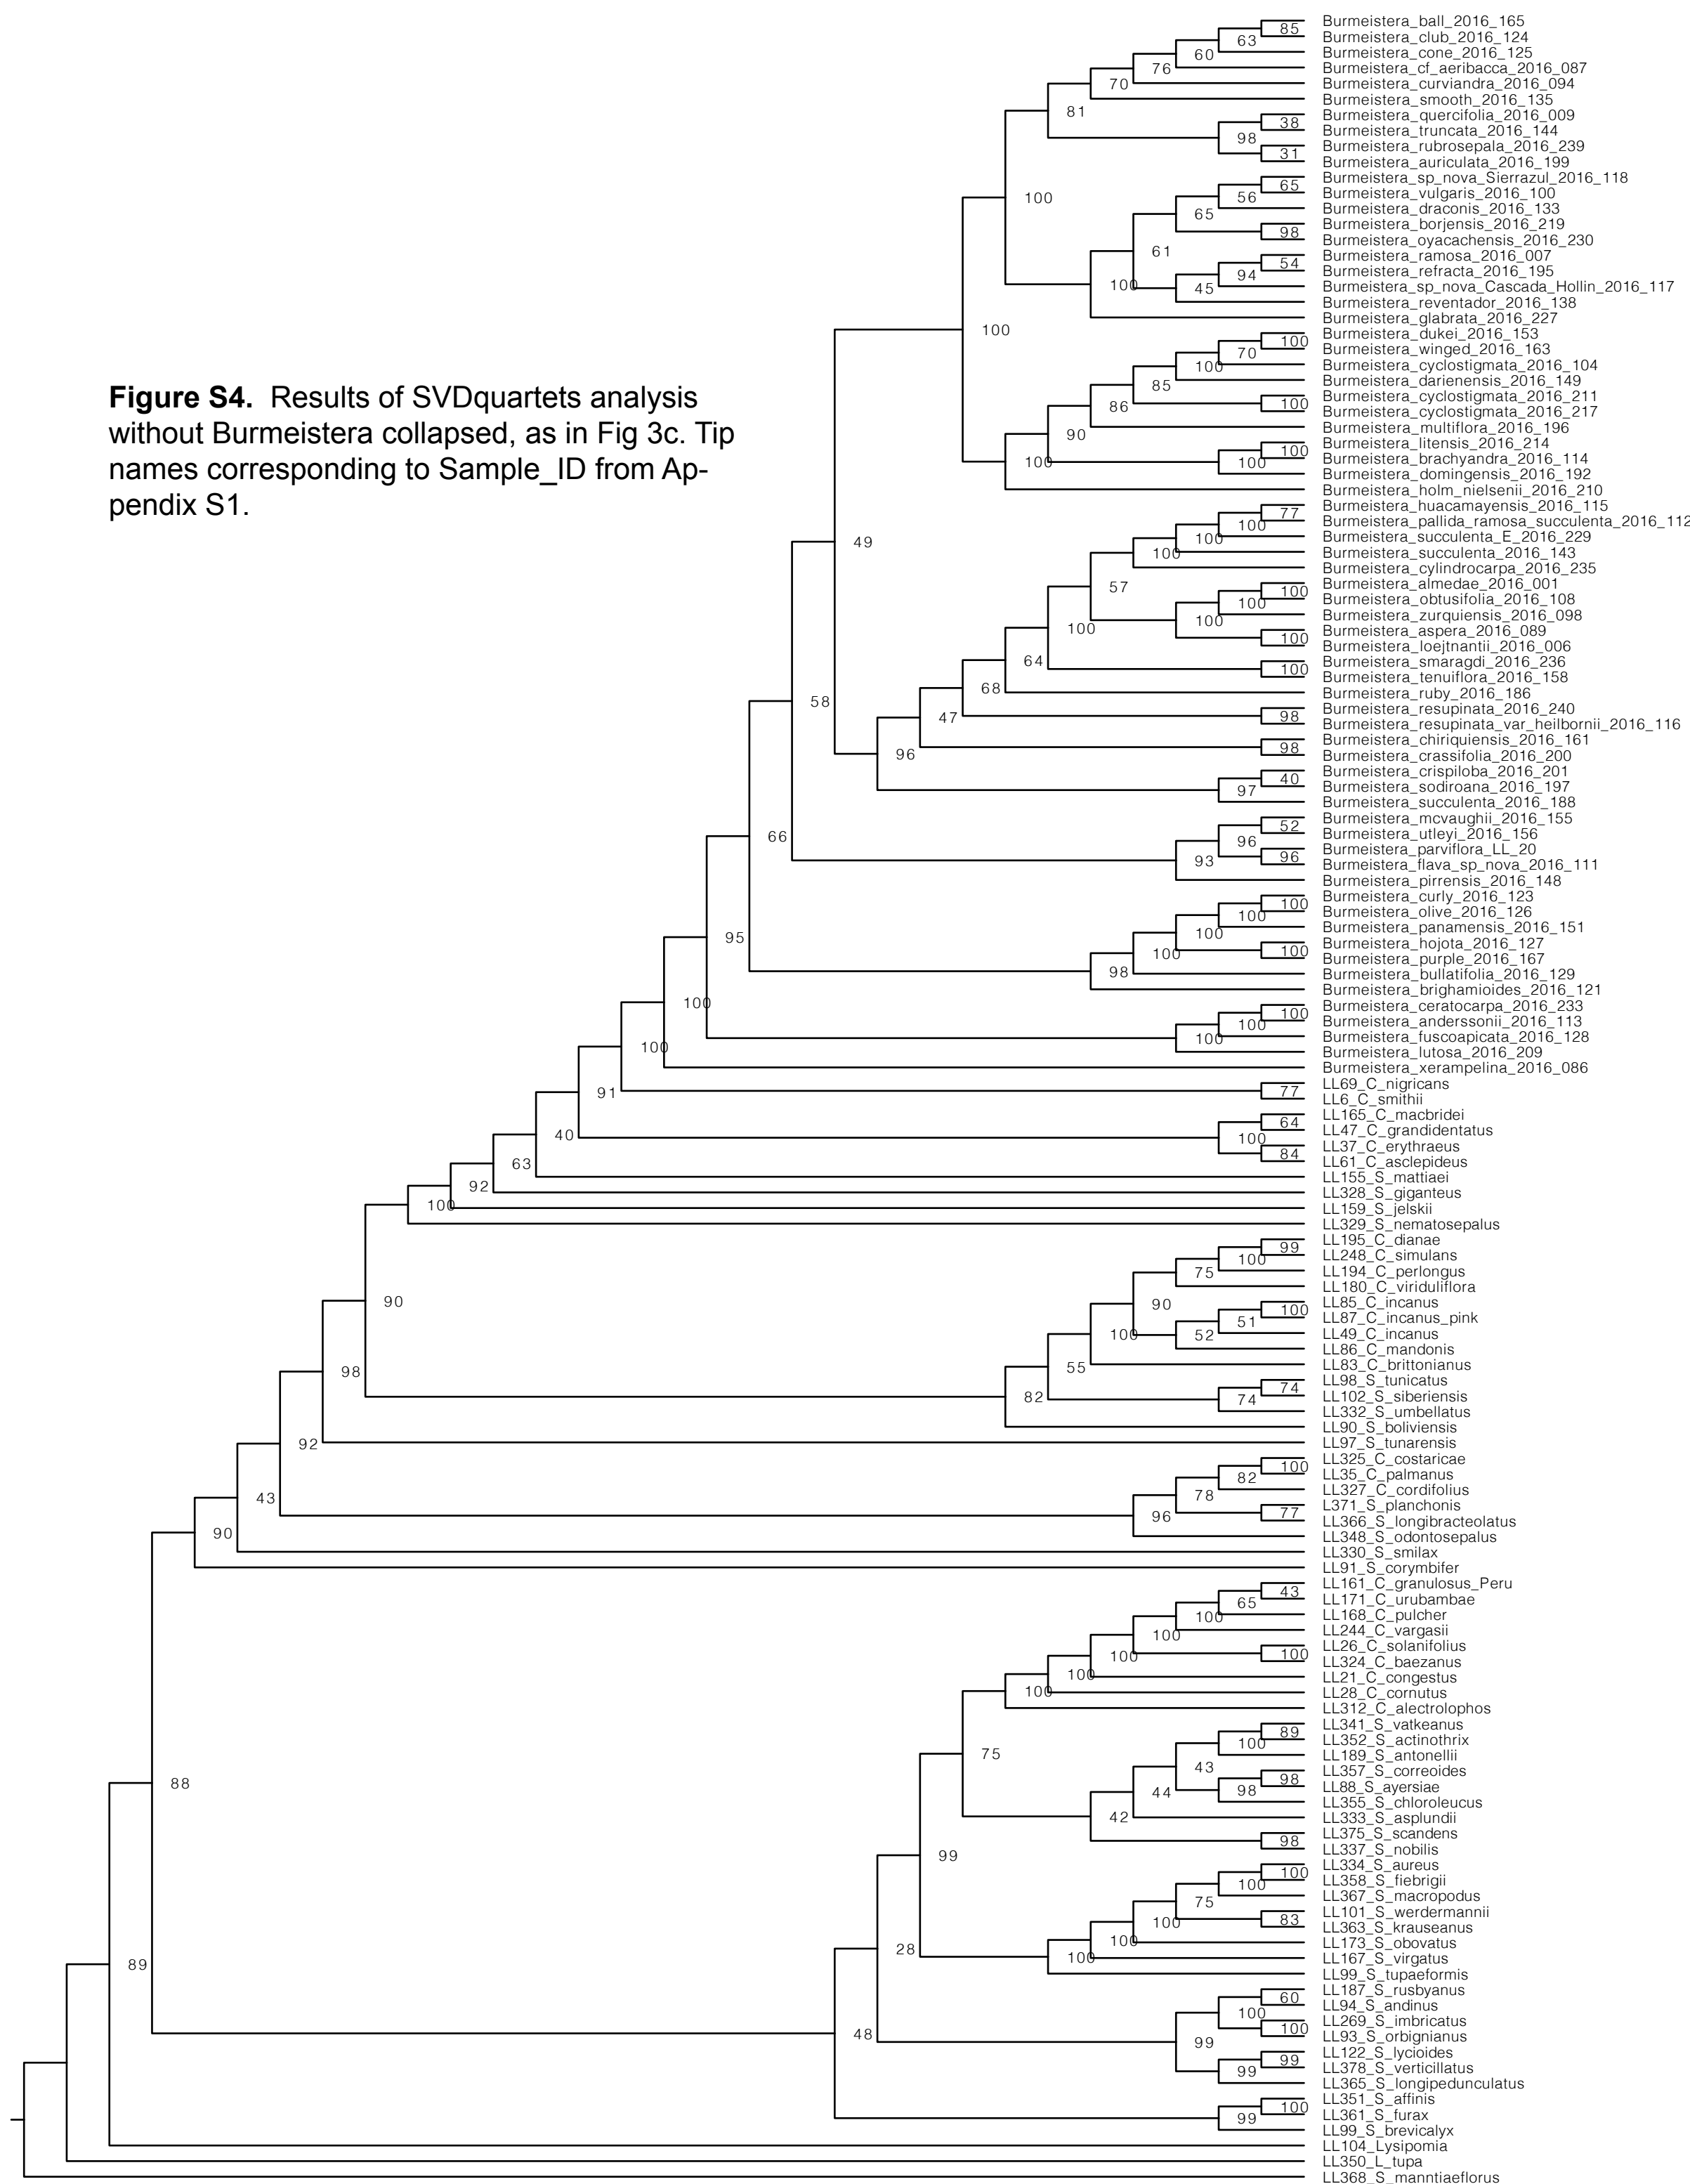

Supplement: mcac046_suppl_supplementary_figure_s4.pdf [file mcac046_suppl_supplementary_figure_s4.pdf]
